# Supplementary material
Source: PubMed Central journal article supplement (PMC4345147)
Supplement: NIHMS621014-supplement-Supp_FigureS1.pdf [file NIHMS621014-supplement-Supp_FigureS1.pdf]

Figure 1. Volume changes in total cortical gray matter and lobar white matter for the alcohol dependent group (nsALC + sALC) across AP1, AP2, and AP3

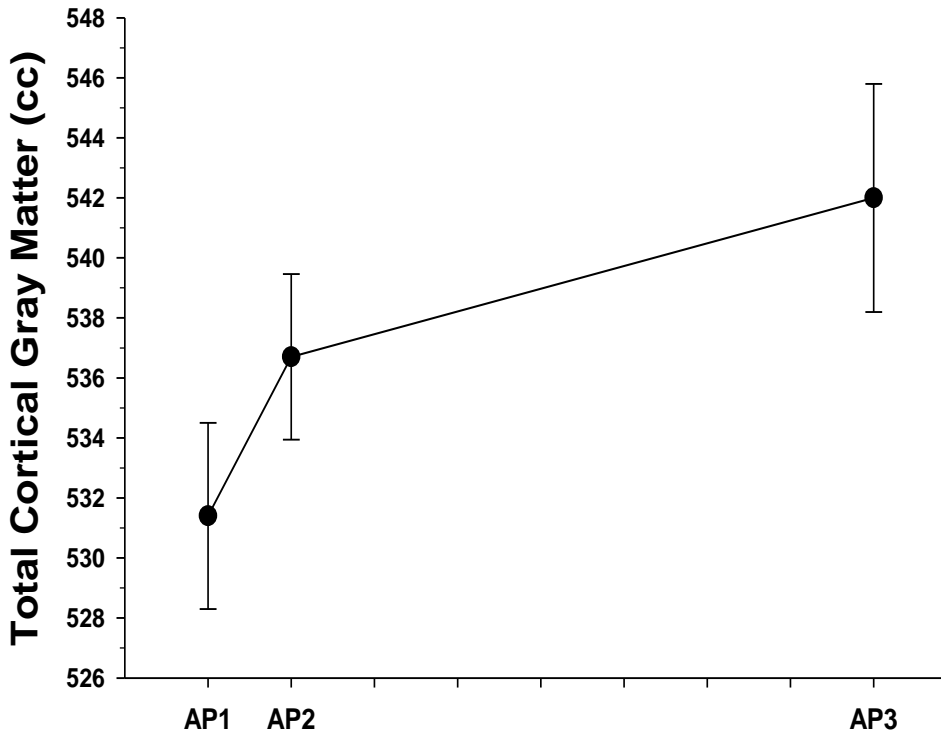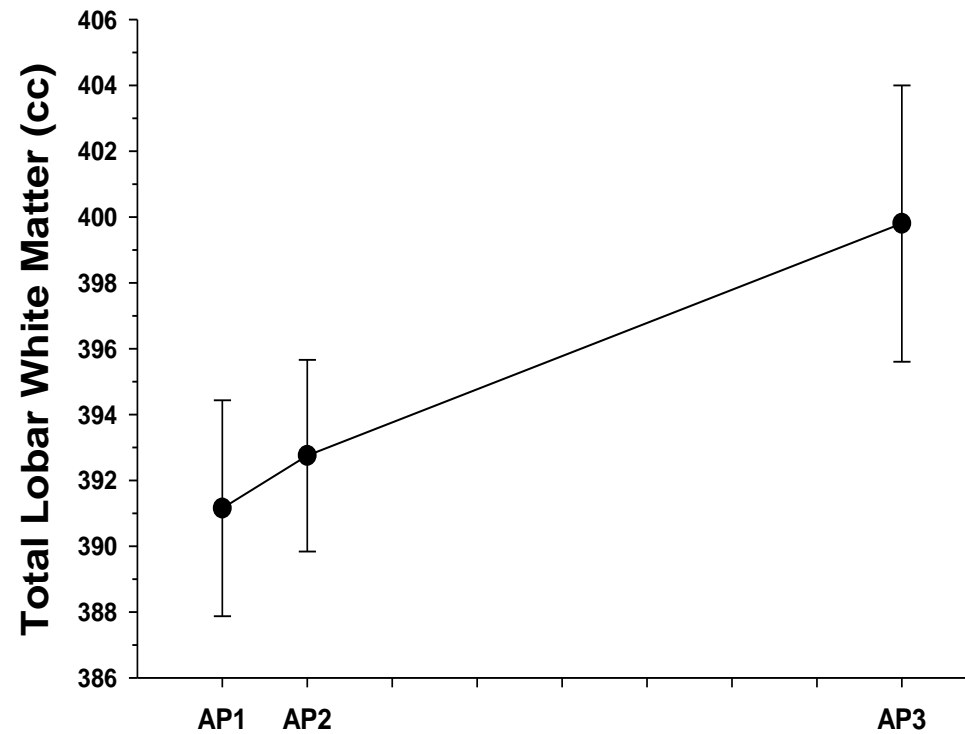

Error bars = standard error of the mean
